# Supplementary material
Source: publisher figshare collection journal article supplement (https://frontiersin.figshare.com/ndownloader/files/35109406)
Supplement: Supplementary file 1 [file 35109406]

Supplementary Material

**Supplementary Table S1 Primers for plasmids construction**

| Primers | Sequences (5’-3’) |
| --- | --- |
| p*PyACT*1-F | GACCATGATTACGCCAAGCTTCCACGCTCAGAGGGTTGAAG |  |
| p*PyACT*1-R | ATGGTACCCTCGAGGGATCCTCTAGAGGGCTTGCTCATGGTGGC |  |
| *PyGUS*-F | TCTAGAGGATCCCTCGAGGGTACCATGCTGCGCCCCGTGGAG |  |
| *PyGUS*-R | CGATCGGGGAAATTCGAGCTCGTCGACACTAGTCTACTGCTTGCCGCCCTGC |  |
| p*PyUBC*-F | GACCATGATTACGCCAAGCTTAGTCTGGAGTACATAGCTGCTGAATG |
| p*PyUBC*-R | CATGGTACCCTCGAGGGATCCTCTAGAAGTAACCATGCGGTGTGAGCG |
| p*PyEF1-a*-F | GACCATGATTACGCCAAGCTTTACTGCCCCCACTGTTGATGC |
| p*PyEF1-a*-R | CATGGTACCCTCGAGGGATCCTCTAGACTCCTTCCCCATGATGAAAGG |
| p*PyDPE2*-F | GACCATGATTACGCCAAGCTTATGGCTCTTCCCTTGACAGATG |
| p*PyDPE2*-R | CATGGTACCCTCGAGGGATCCTCTAGACGCCATGGCTTGTTCTCCA |
| d35S-F | GACCATGATTACGCCAAGCTTTACTCCAAAAATGTCAAAGATACAGTCTC |
| d35S-R | CATGGTACCCTCGAGGGATCCTCTAGATCTCCAAATGAAATGAACTTCCTTAT |
